# Supplementary material for: Dengue Virus Capsid Protein Facilitates Genome Compaction and Packaging
Source: MDPI journal article supplement (doi:10.3390/ijms24098158), 2023-05-02
Supplement: s1 [file s1]

# SUPPORTING INFORMATION FILE

MANUSCRIPT TITLE: Dengue Virus Capsid Protein Facilitates Genome Compaction and Packaging

MANUSCRIPT AUTHORS & AFFILIATIONS: Priscilla L. S. Boon <sup>1,2,†</sup>, Ana S. Martins <sup>3,†</sup>, Xin Ni Lim <sup>4</sup>, Francisco J. Enguita <sup>3</sup>, Nuno C. Santos <sup>3</sup>, Peter J. Bond <sup>1,2</sup>, Yue Wan <sup>4</sup>, Ivo C. Martins <sup>3,\*</sup> and Roland G. Huber <sup>1,\*</sup>

<sup>1</sup> Bioinformatics Institute (BII), Agency for Science, Technology and Research (A\*STAR), Singapore 138671, Singapore

<sup>2</sup> Department of Biological Sciences (DBS), National University of Singapore (NUS), 16 Science Drive 4, Singapore 117558, Singapore

<sup>3</sup> Instituto de Medicina Molecular, Faculdade de Medicina, Universidade de Lisboa, Av. Prof. Egas Moniz, 1649-028 Lisbon, Portugal

<sup>4</sup> Genome Institute of Singapore (GIS), Agency for Science, Technology and Research (A\*STAR), Singapore 138672, Singapore

\* Correspondence: ivomartins@fm.ul.pt (I.C.M.); rghuber@bii.a-star.edu.sg (R.G.H.)

† These authors contributed equally to this work.

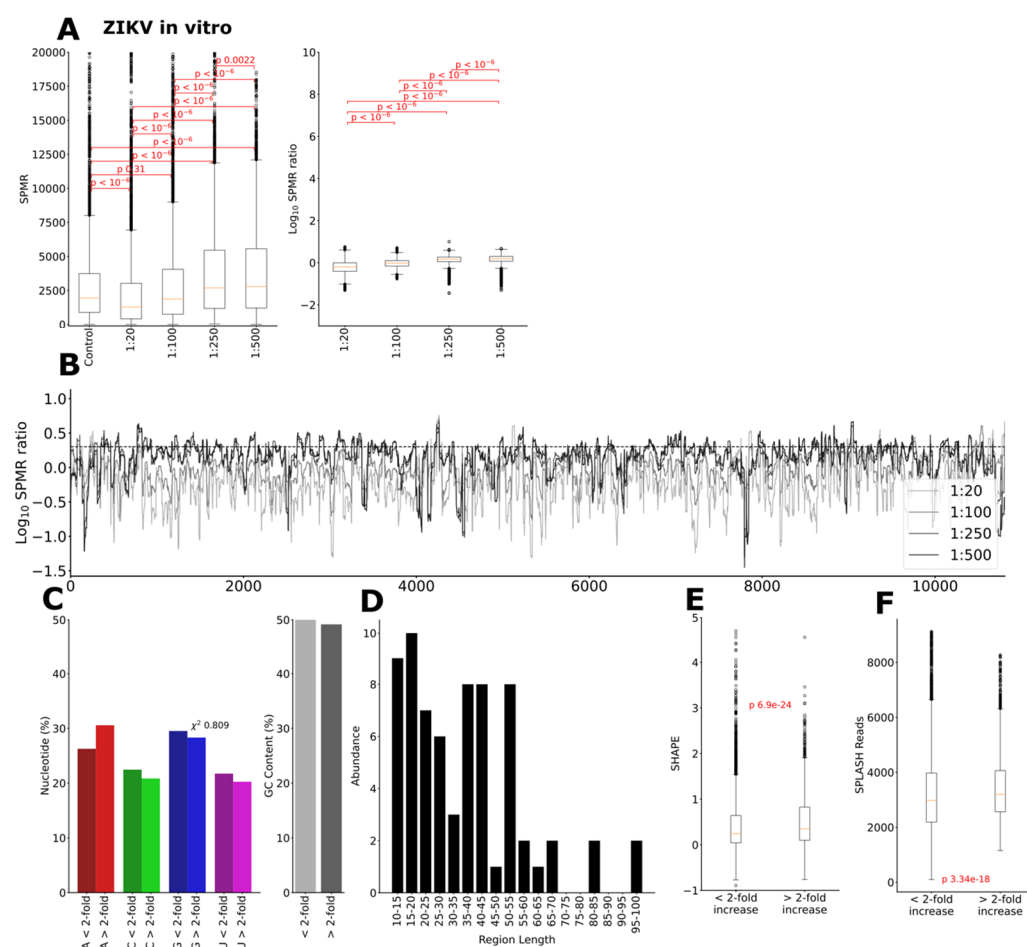

**Figure S1.** ZIKV C protein data. Abundance of (A) reads after SPMR normalization in ZIKV and ratio of read abundance over control show that at a molar ratio of 1:250 the genomes are saturated with C protein, indicating that the saturation point lies at or below this level. (B) Localization of binding signal along the ZIKV genome for *in vitro* transcribed genomic RNA. (C) The nucleotide composition and GC content of C protein binding locations is not significantly different from non-binding locations. (D) Average length of interacting segments shows multimodal distribution consistent with clusters of fixed-length interactions. (E) Binding *in vitro* preferentially occurs in higher SHAPE reactivity, single-stranded, and open regions of the viral genome. (F) ZIKV C shows *in vitro* preference for regions of long-range intramolecular RNA-RNA interactions, as measured by SPLASH.

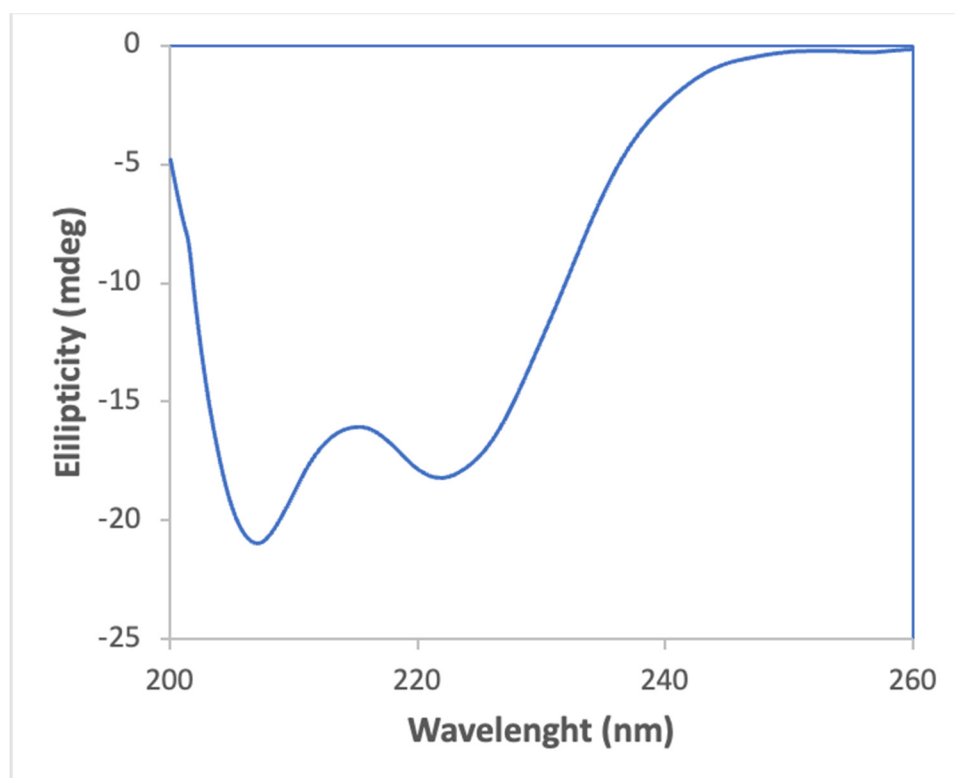

**Figure S2.** CD spectra obtained for ZIKV C protein at 25 °C. A typical spectrum for an  $\alpha$ -helix secondary structure is obtained for ZIKV C protein at 25 °C (black line), as expected. CD measurements were performed as previously described for DENV C (Faustino et al. *Int J Mol Sci* 20 (2019) 3870. doi:10.3390/ijms20163870), in 50 mM  $\text{KH}_2\text{PO}_4$ , 200 mM KCl, pH 7.5 buffer, at 25 °C.

**Table S1.** Overview of samples, conditions and number of aligned reads per sample.

| Experiment  | Condition  | Sample  | Aligned Reads |
|-------------|------------|---------|---------------|
| DENV FP     | Control    | RHH7758 | 1132561       |
| DENV FP     | Control    | RHH7759 | 955739        |
| DENV FP     | 1:20       | RIS013  | 540638        |
| DENV FP     | 1:20       | RIS014  | 690978        |
| DENV FP     | 1:100      | RIS017  | 1655          |
| DENV FP     | 1:100      | RIS018  | 633412        |
| DENV FP     | 1:250      | RIS015  | 634442        |
| DENV FP     | 1:250      | RIS016  | 565531        |
| DENV FP     | 1:500      | RIS019  | 834199        |
| DENV FP     | 1:500      | RIS020  | 856445        |
| ZIKV FP     | Control    | RHH5774 | 3286046       |
| ZIKV FP     | Control    | RHH5775 | 1870611       |
| ZIKV FP     | 1:20       | RIS033  | 302268        |
| ZIKV FP     | 1:20       | RIS034  | 440390        |
| ZIKV FP     | 1:100      | RIS037  | 462708        |
| ZIKV FP     | 1:100      | RIS038  | 467441        |
| ZIKV FP     | 1:250      | RIS035  | 518893        |
| ZIKV FP     | 1:250      | RIS036  | 711872        |
| ZIKV FP     | 1:500      | RIS039  | 747313        |
| ZIKV FP     | 1:500      | RIS040  | 868036        |
| DENV X-link | Background | RVH206  | 12623591      |
| DENV X-link | Background | RVH207  | 6602451       |
| DENV X-link | Control    | RVH208  | 12132361      |
| DENV X-link | Control    | RVH209  | 8118898       |
| DENV X-link | X-linked   | RVH210  | 49213149      |
| DENV X-link | X-linked   | RVH211  | 70714181      |

**Table S2.** Correlation of SPMR between samples for all footprinting and crosslinking experiments.

| Experiment  | Condition  | Sample 1 | Sample 2 | Pearson r |
|-------------|------------|----------|----------|-----------|
| DENV FP     | Control    | RHH7758  | RHH7759  | 0.999     |
| DENV FP     | 1:20       | RIS013   | RIS014   | 0.833     |
| DENV FP     | 1:100      | RIS017   | RIS018   | 0.953     |
| DENV FP     | 1:250      | RIS015   | RIS016   | 0.866     |
| DENV FP     | 1:500      | RIS019   | RIS020   | 0.974     |
| ZIKV FP     | Control    | RHH5774  | RHH5775  | 0.818     |
| ZIKV FP     | 1:20       | RIS033   | RIS034   | 0.651     |
| ZIKV FP     | 1:100      | RIS037   | RIS038   | 0.856     |
| ZIKV FP     | 1:250      | RIS035   | RIS036   | 0.928     |
| ZIKV FP     | 1:500      | RIS039   | RIS040   | 0.986     |
| DENV X-link | Background | RVH206   | RVH207   | 0.941     |
| DENV X-link | Control    | RVH208   | RVH209   | 0.958     |
| DENV X-link | X-linked   | RVH210   | RVH211   | 0.946     |
